# Supplementary material for: A first-principles alternative to empirical solvent parameters
Source: Royal Society of Chemistry journal article supplement (doi:10.1039/d4cp01975j), 2024-01-01
Supplement: d4cp01975j2.zip [file d4cp01975j2.zip]

## Sheet: solvent_parameters
Solvent_long	Solvent	ET_N	π*	DN	β	AN	α	μ	delta	Z	acetone C NMR	other DN2	SbCl5A (kJ/mol)	BF3 (kJ/mol)	Na+ delta	sho+	sho-	POL	C6 dispersion coefficient (MCLF)	DI	Na-solvent UE (all atom)	C6^1/3	r+(A)	r-(A)	q+(a.u.)	q-(a.u)	alt_r	alt_q	alt_sho	CN(Et3PO_64solv)	Sho+.CN					GDMA(MP2/aug-cc-pVDZ) charges +	GDMA(MP2/aug-cc-pVDZ) charges -	CN(Et3PO_32solv_VEL) O-C.O.M.	CN(Et3PO_16solv_VEL) O-H	CN(Et3PO_64solv_VEL) O-H
Water	water	1	1.09	18	0.47	54.8	1.17	0		94.8438	-8.92088	18	101.7	104.4	0	8.55012	-7.8181	1.25482	44.8406	0.614665	-121.953	3.55269	0.738021	1.61424	0.393849	-0.787697				3.9	33.3455					0.207522	-0.415043	3.2294	3.0603	3.0603
Methanol	MeOH	0.762	0.6	19	0.66	41.5	0.98	0.02		83.588	-4.63651	19	79.8	109.2		7.56264	-5.06568	2.9167	213.617	0.610264	-91.4591	5.97785	0.729384	1.56429	0.344286	-0.494588				3.0168	22.815					0.224426	-0.452662	1.9223	2.3174	2.3174
Ethanol	EtOH	0.654	0.54	19.2	0.75	37.1	0.86	0.08		79.6091	-3.85301	19.2				7.62052	-5.49876	4.61119	520.904	0.610086	-104.569	8.04611	0.728533	1.57966	0.346516	-0.54215				3.0126	22.9576					0.225	-0.46274	2.7596	2.718	1.6372
n‐Propanol	PrOH	0.617	0.52	19.8	0.9	33.7	0.84	0.16		76.2309		19.8				7.6439	-5.48402	6.28388	964.735	0.617982	-95.8617	9.88104	0.735359	1.59126	0.341194	-0.537227
i‐Propanol	2PrOH	0.545	0.48	21.1	0.84	33.5	0.76				-1.82647	21.1				7.50515	-5.72273	6.25262	947.717		-112.132	9.82259	0.74328	1.58166	0.348178	-0.564945				2.8358	21.2831					0.23047	-0.462174		2.1251	2.1251
1-butanol	BuOH			19.5		36.8						19.5				7.64947	-5.44547	7.98933	1556			11.5879	0.726161	1.57959	0.3467	-0.53687
t‐Butanol	tBuOH	0.389	0.41	38	0.93	27.1	0.42									7.26435	-5.71798	7.90027	1725.8			11.9949	0.751052	1.5968	0.340531	-0.569881
Trifluoroethanol	TFE	0.898	0.73		0	53.8	1.51	-0.12								8.45047	-4.91017	4.62156	798.631			9.27788	0.702421	1.56357	0.360013	-0.470801
Ethylene glycol	EG	0.79	0.92	20	0.52	43.4	0.9	-0.03				20				7.57126	-5.29289	5.12583	721.865			8.97054	0.733387	1.5701	0.34657	-0.518693
Tetrahydrofuran	THF	0.207	0.55	20	0.55	8		0		58.7639	0.793274	20	88	90.4	-5.5	1.72549	-3.2009	7.17595	1293.14			10.8947	0.821539	1.53762	0.088477	-0.307192
1,4‐Dioxane	C4H8O2	0.164	0.49	14.8	0.37	10.8		0.07			-0.00840742	14.8	61.9	74.09		1.55125	-2.93906	7.72245	1647.29			11.8102	0.819787	1.53771	0.079373	-0.282079
Acetone	ACE	0.355	0.62	17	0.48	12.5	0.08	0.03		65.3046	0.0427777	17	71.25	76.03	5.8	3.03907	-4.80604	5.77976	795.183		-129.53	9.26451	0.808682	1.57253	0.153394	-0.471711	1.48499	0.591618	6.38306	3.8779	11.7852					0.0905482	-0.45721	2.9173	3.1655	3.1655
Propylene carbonate	PC	0.472	0.83	15.1	0.4	18.3		-0.09				15.1		64.19		2.88862	-5.34807	7.82337	1785.41		-154.728	12.1315	0.793635	1.57359	0.143087	-0.525265	1.43578	0.795275	8.87444	4.2063	12.1504							2.0195	4.3309	4.3309
Propylene carbonate	PC	0.472	0.83	15.1	0.4	18.3		-0.09				15.1		64.19		2.88862	-4.41754	7.82337	1785.41		-154.728	12.1315
γ‐Butyrolactone	GBL	0.42	0.85	18	0.49	17.3		0.02				18				2.65621	-5.04454	7.73016	1433.01			11.2741	0.798171	1.57674	0.132327	-0.496446
Formamide	FA	0.775	0.97	24	0.48	39.8	0.71	0.09		83.3675		24		115.32		7.42032	-4.99606	3.70652	369.944	1.1179	-144.612	7.17869	0.737164	1.586	0.322931	-0.494563	1.59699	-0.492589	#REF!	3.602	26.728					0.198749	-0.479539	3.6592	2.8595	2.8595
N‐Methylformamide	NMF	0.722	0.9	27	0.8	32.1	0.62	0.17				27				5.51307	-4.90431	5.35314	741.256			9.05016	0.756559	1.5819	0.260331	-0.484223	1.62082	-0.340291		3.4976	19.2825					0.18426	-0.50892	1.907	2.5246	1.3257
N,N‐Dimethylformamide	DMF	0.386	0.88	26.6	0.69	16		0.11		68.1554	-0.661224	26.6		110.49	4.5	2.60502	-4.88575	7.08038	1257.11			10.7925	0.819681	1.58779	0.133274	-0.484188
N,N‐Dimethylacetamide	DMA	0.377	0.85	27.8	0.76	13.6		0.17		66.6568		27.8		110.56		3.1432	-5.50751	8.67469	1879.83			12.3416	0.805614	1.5929	0.158048	-0.547561	1.50724	0.54046		4.0241	12.6486					0.121786	-0.533413	3.2624
N‐Methylpyrrolidinone	NMPy	0.355	0.92	27.3	0.77	13.3		0.13				27.3				2.52283	-5.41517	9.65448	2400.5			13.3896	0.823929	1.59775	0.129738	-0.540021
Ammonia	NH3	0.272		59								59				6.31439	-8.45762	1.90965	81.9487	0.791964	-107.606	4.34357	0.775204	1.73614	0.305518	-0.916477
Pyridine	Py	0.302	0.87	33.1	0.64	14.2		0.64		63.8282		33.1	142.3		-6.6	2.07438	-2.84458	9.22578	1756.35		-65.9856	12.0653	0.821265	1.66234	0.106337	-0.29514
Acetonitrile	MeCN	0.46	0.66	14.1	0.37	18.9	0.19	0.34		71.0844	-2.07589	14.1	61.1	60.39	6.4	3.23352	-4.09922	4.24621	436.384	1.92033	-117.957	7.58501	0.785788	1.68014	0.158588	-0.429869				3.4502	11.1563					0.0974861	-0.275402		2.8625	2.8625
Benzonitrile	PhCN	0.333	0.88	11.9	0.37	15.5		0.34				11.9		55.44		2.31245	-3.53033	12.5552	3160.53			14.6753	0.814831	1.66446	0.117606	-0.366758
Nitromethane	MeNO2	0.481	0.75	2.7	0.06	20.5	0.22	0.03		71.0783		2.7		37.63		3.29917	-3.70511	4.55013	517.289		-99.4245	8.02745	0.778771	1.54921	0.160363	-0.358263													3.0454	3.0454
Nitrobenzene	PhNO2	0.324	0.86	4.4	0.3	14.8		0.23				4.4		35.79		2.45811	-3.45843	12.4639	3209.58			14.7508	0.821743	1.54232	0.126076	-0.332929
Nitrobenzene	PhNO2	0.324	0.86	8.1	0.3	14.8		0.23						35.79		2.45811	-3.45843	12.4639	3209.58			14.7508	0.821743	1.54232	0.126076	-0.332929
Chloroform	CHCl3	0.259	0.58	4	0.1	23.1	0.2			63.1162	-2.21427	4				1.98289	-0.796848	4.1819	1403.48			11.1961	0.818369	2.13894	0.101283	-0.106381
1.1‐Dichloroethane	11DCE	0.269	0.48		0.1	16.2	0.1	0.07								3.66729	-0.701638	7.79284	1233.25			10.7238	0.791458	2.13503	0.18116	-0.093499
1,2‐Dichloroethane	EDC	0.327	0.73	0	0.1	16.7		0.03				0				2.1186	-1.16712	7.86338	1336.99		-64.2613	11.0165	0.825092	2.15005	0.109104	-0.156622				5.6821	12.0381
Dimethylsulfoxide	DMSO	0.444	1	29.8	0.76	19.3		0.22		70.781		29.8		105.34	0	3.39652	-5.97826	7.29776	1128.78		-199.967	10.412	0.790083	1.63994	0.167493	-0.611918	0.801165	0.156902	3.39652	3.8672	13.135					0.0907918	-0.970174
Tetramethylenesulfone	TMS	0.41	0.9	14.8	0.39	19.2		0								2.92519	-6.0465	9.8194	2500.5			13.573	0.795249	1.60787	0.145004	-0.606798
Tetrahydrothiophene	THT	0.185	0.6		0.44			0.8								1.93337	-0.976651	9.51637	1889.37			12.3625	0.821522	2.2447	0.099092	-0.136832
Trimethylphosphate	TMP	0.398	0.73	23	0.77	16.3		0.02				23		84.75		2.24276	-7.67296		3058.75			14.516	0.789421	1.6469	0.110505	-0.788712
Hexamethyl phosphoric triamide	HMPT	0.315	0.87	38.8	1	9.8		0.29				38.8				2.27862	-7.19472	17.326	8145.01		-224.722	20.1201	0.835211	1.65801	0.118784	-0.744545
n-hexane	hexane		-0.08		0	0					2.40968	0				2.01277	0	10.7946	2655.79		-18.726	13.8483	0.822251		0.103297					2.9772	5.99241					0.0706616
diethyl ether	DEE		0.27	19.2	0.47	3				64.5208	1.94803	19.2	80.3	78.77		2.13356	-3.0536	8.08669	1615.04	0.786112	-81.0452	11.7326	0.820784	1.69055	0.120729	-0.38724				3.8477	8.2093					0.0701373	-0.518587
toluene	TOL			0.1		6.8						0.1		3.3		2.41136	-1.15329	11.8892	2804.57	1.35297	-62.9609	14.1023	0.817346	1.67592	0.123015	-0.158404	1.68995	-0.38927	-3.69052	4.0531	9.77349					0.0865093	-0.103693
tetrachloromethane	CCl4			0		8.6					1.2943	0					-0.691943	9.74502	2203.23			13.0123		2.13626		-0.09226
sulfuryl chloride	SO2Cl2			0.1												9.33859	-4.67084	7.97645	1449.39			11.3169	1.97237	1.56021	1.14964	-0.45485
thionyl chloride	SOCl2			0.4								0.4				5.77318	-3.88526	8.22436	1214.78			10.67	2.05873	1.55141	0.741829	-0.376216
selenium oxychloride	SeOCl2			12.2												7.18072	-4.9135	8.97506	1393.94			11.1707	2.20161	1.618	0.986731	-0.496201
piperidine	C5H11N			40								51				4.70804	-4.05243	9.49266	2186.59			12.9794	0.77126	1.66675	0.226637	-0.421575
phosphorus oxychloride	POCl3			11.7								11.7					-5.94965	9.25261	1992.04			12.5825		1.6017		-0.594788
phenol	PhOH			11								11				8.45055	-5.18629	10.6734	2362.47			13.3185	0.70819	1.55605	0.373529	-0.503697
benzene	benzene			0.1						54.0519		0.1				1.81489	-0.912588	10.0894	1960.57	1.1602		12.5159	0.828749	1.66565	0.093878	-0.094874
aniline	PhNH2			35								35				6.23464	-6.36794	11.504	2664.17	0.976983		13.8629	0.75495	1.69127	0.293778	-0.672203
benzyl_alcohol	PhMeOH			23		36.8						23				7.93401	-5.28615	12.4553	3294.55			14.8799	0.714004	1.56961	0.353576	-0.517869
triethylamine	TEA			61												1.98231	-2.06816	12.2548	3489.8			15.1682	0.845796	1.62852	0.104647	-0.210217
triethylamine	TEA			31.7												1.98231	-2.06816	12.2548	3489.8			15.1682	0.845796	1.62852	0.104647	-0.210217
aceticacid	CH3COOH					52.8191				79.1731	-6.06949					8.60467	-5.64715	4.63208	583.855			8.35799	0.735783	1.5615	0.380329	-0.550377
Heavy water	D2O	0.991						0.0014
Tetramethylurea	TMU	0.315	0.79	29.6	0.71	9.2		0.14						108.62
glyme										58.9439

## Sheet: DDEC6 parameters table
Solvent_long	Solvent	sho+	sho-	q+(a.u.)	q-(a.u)	r+(A)	r-(A)	POL	C6 (MCLF)	sho++sho-
Water	water	8.55012	-7.8181	0.393849	-0.787697	0.738021	1.61424	1.25482	44.8406	16.3682
Ammonia	NH3	6.31439	-8.45762	0.305518	-0.916477	0.775204	1.73614	1.90965	81.9487	14.772
phenol	PhOH	8.45055	-5.18629	0.373529	-0.503697	0.70819	1.55605	10.6734	2362.47	13.6368
t‐Butanol	tBuOH	7.58829	-5.82589	0.349269	-0.577082	0.73744	1.58703		1527.38	13.4142
Trifluoroethanol	TFE	8.45047	-4.91017	0.365683	-0.476847	0.693321	1.55594	4.62156	798.631	13.3606
i‐Propanol	2PrOH	7.50515	-5.72273	0.348178	-0.564945	0.74328	1.58166	6.25262	947.717	13.2279
benzyl_alcohol	PhMeOH	7.93401	-5.28615	0.353576	-0.517869	0.714004	1.56961			13.2202
n‐Propanol	PrOH	7.6439	-5.48402	0.34632	-0.541503	0.725894	1.58202	6.28388	964.735	13.1279
Ethanol	EtOH	7.62052	-5.49876	0.346516	-0.54215	0.728533	1.57966	4.61119	520.904	13.1193
1-butanol	BuOH	7.64947	-5.44547	0.3467	-0.53687	0.726161	1.57959	7.98933	1556	13.0949
Ethylene glycol	EG	7.57126	-5.29289	0.34657	-0.518693	0.733387	1.5701	5.14998	721.865	12.8642
Methanol	MeOH	7.56264	-5.06568	0.344286	-0.494588	0.729384	1.56429	2.9167	213.617	12.6283
aniline	PhNH2	6.23464	-6.36794	0.293778	-0.672203	0.75495	1.69127	11.504	2664.17	12.6026
Formamide	FA	7.42032	-4.99606	0.322931	-0.494563	0.737164	1.586	3.70652	369.944	12.4164
selenium oxychloride	SeOCl2	7.18072	-4.9135	0.986731	-0.496201	2.20161	1.618	8.97506	1393.94	12.0942			-3.35709
N‐Methylformamide	NMF	5.51307	-4.90431	0.260331	-0.484223	0.756559	1.5819	5.35314	741.256	10.4174
Hexamethyl phosphoric triamide	HMPT	2.27862	-7.19472	0.118784	-0.744545	0.835211	1.65801	17.326	8145.01	9.47334	MP2/aug-cc-pVDZ
Trimethylphosphate	TMP	2.06048	-7.37065	0.103194	-0.761507	0.802411	1.65531	10.3186	3227.17	9.43113	MP2/aug-cc-pVDZ
Dimethylsulfoxide	DMSO	3.39652	-5.97826	0.167493	-0.611918	0.790083	1.63994	7.29776	1128.78	9.37478
Tetramethylenesulfone	TMS	2.92519	-6.0465	0.145178	-0.606798	0.795165	1.60787	9.8194	2500.5	8.97169			-2.398
piperidine	C5H11N	4.70804	-4.05243	0.226637	-0.421575	0.77126	1.66675	9.49266	2186.59	8.76048
N,N‐Dimethylacetamide	DMA	3.1432	-5.50751	0.158048	-0.547561	0.805614	1.5929	8.67469	1879.83	8.65072
Propylene carbonate	PC	2.88862	-5.34807	0.143087	-0.525265	0.793635	1.57359	7.82337	1785.41	8.23668
N‐Methylpyrrolidinone	NMPy	2.52283	-5.41517	0.129738	-0.540021	0.823929	1.59775	9.65448	2400.5	7.938
Acetone	ACE	3.03907	-4.80604	0.153394	-0.471711	0.808682	1.57253	5.77976	795.183	7.84512
γ‐Butyrolactone	GBL	2.65621	-5.04454	0.132327	-0.496446	0.798171	1.57674	7.24515	1433.01	7.70075
N,N‐Dimethylformamide	DMF	2.60502	-4.88575	0.133274	-0.484188	0.819681	1.58779	7.08038	1257.11	7.49077
Acetonitrile	MeCN	3.23352	-4.09922	0.158588	-0.429869	0.785788	1.68014	4.24621	436.384	7.33273
Nitromethane	MeNO2	3.29917	-3.70512	0.160363	-0.358263	0.778771	1.54921	4.55013	517.289	7.00429
phosphorus oxychloride	POCl3		-5.94965		-0.594788		1.6017	9.25261	1992.04	5.94965			-3.54917
Nitrobenzene	PhNO2	2.45814	-3.4585	0.126076	-0.332929	0.821743	1.54232	12.4639	3209.58	5.91664
Benzonitrile	PhCN	2.31245	-3.53033	0.117606	-0.366758	0.814831	1.66446	12.5552	3160.53	5.84278
diethyl ether	DEE	2.13356	-3.0536	0.120729	-0.38724	0.820784	1.69055	8.08669	1615.04	5.18716
Tetrahydrofuran	THF	1.72549	-3.2009	0.821539	-0.307192	0.088477	1.53762	7.17595	1293.14	4.92639
Pyridine	Py	2.07438	-2.84458	0.106333	-0.29514	0.821279	1.66234	9.22578	1756.35	4.91896
sulfuryl chloride	SO2Cl2		-4.67084		-0.45485		1.56021	7.97645	1449.39	4.67084			-2.78724
1,4‐Dioxane	C4H8O2	1.55125	-2.93906	0.079373	-0.282079	0.819787	1.53771		1647.29	4.49031	NOT in Analysis because I added them too late (to check other stuff?)
thionyl chloride	SOCl2		-4.39014							4.39014	?
1.1‐Dichloroethane	11DCE	3.66729	-0.701638	0.18116	-0.093499	0.791458	2.13503	7.79284	1233.25	4.36892
triethylamine	TEA	1.98231	-2.06816	0.104647	-0.210217	0.845796	1.62852		3607.82	4.05047	MP2/aug-cc-pVDZ
Chloroform	CHCl3	1.98289	-0.796848	0.818369	2.13894	0.101283	-0.106381	4.1819	1403.48	2.77973
toluene	TOL	2.41136	-1.15329	0.123015	-0.158404	0.817346	1.67592	11.8892	2804.57	3.56465
1,2‐Dichloroethane	EDC	2.1186	-1.16712	0.109104	-0.156622	0.825092	2.15005	7.86338	1336.99	3.28572
Tetrahydrothiophene	THT	1.93337	-0.976651	0.099151	-0.136832	0.82166	2.2447	9.51637	1889.37	2.91002
benzene	benzene	1.81489	-0.912588	0.093878	-0.094874	0.828749	1.66565	10.0894	1960.57	2.72748
n-hexane	hexane	2.01277		0.103297		0.822251		10.7946	2655.79	2.01277
tetrachloromethane	CCl4		-0.691943		-0.09226		2.13626	9.74502	2203.23	0.691943
